# Supplementary material for: Cross-species analysis of LZTR1 loss-of-function mutants demonstrates dependency to RIT1 orthologs
Source: eLife journal article supplement (doi:10.7554/elife.76495), 2022-04-25

| Transgene: - |                          | <i>Ras<sup>HA</sup></i> |                          | <i>Ric<sup>HA</sup></i> |                          |
|--------------|--------------------------|-------------------------|--------------------------|-------------------------|--------------------------|
| <i>yw</i>    | <i>Lztr1<sup>2</sup></i> | <i>yw</i>               | <i>Lztr1<sup>2</sup></i> | <i>yw</i>               | <i>Lztr1<sup>2</sup></i> |

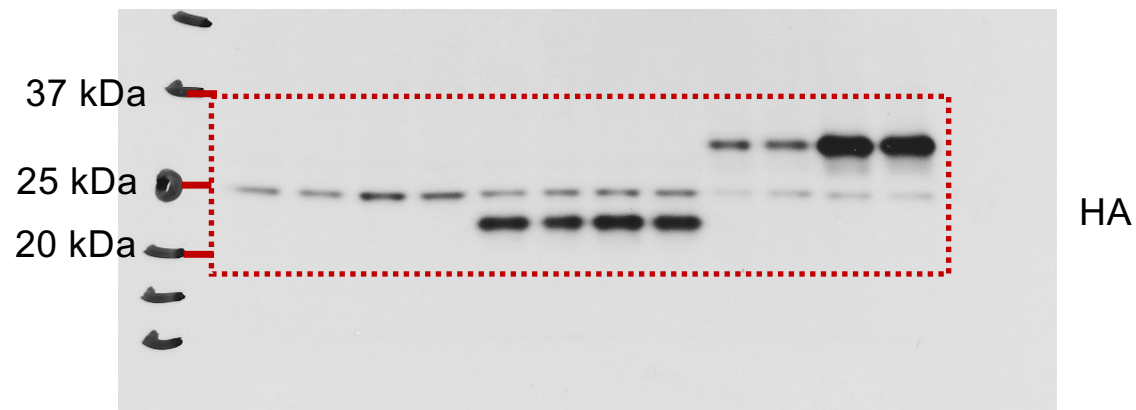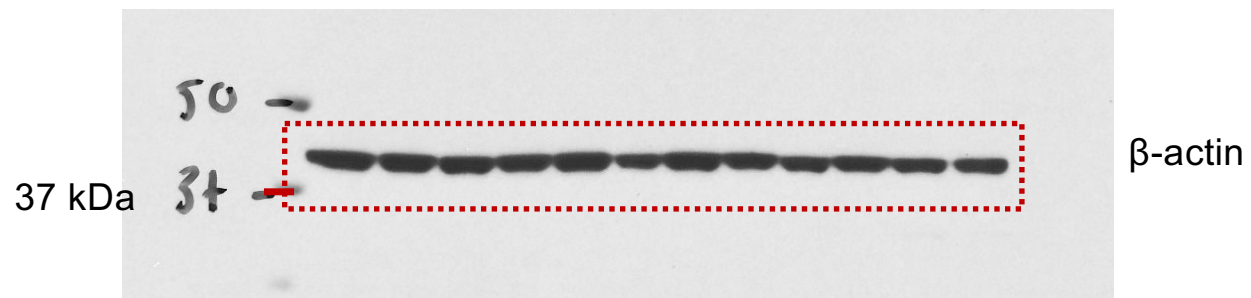

Supplement: supp [file elife-76495-supp-v1.zip]
