# Supplementary material for: Cross-species analysis of LZTR1 loss-of-function mutants demonstrates dependency to RIT1 orthologs
Source: eLife journal article supplement (doi:10.7554/elife.76495), 2022-04-25

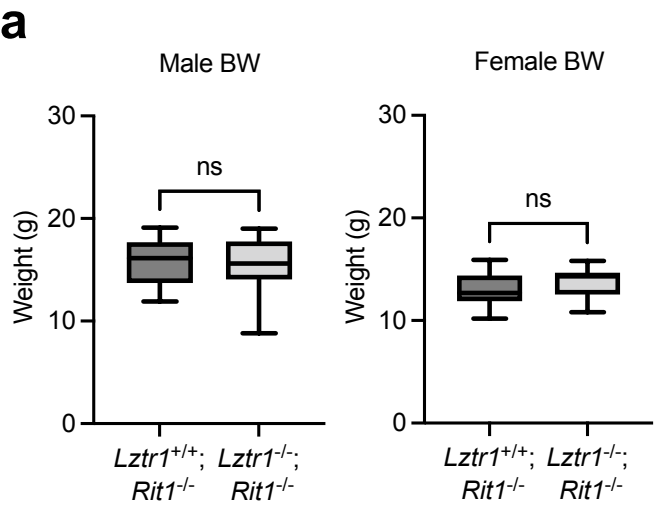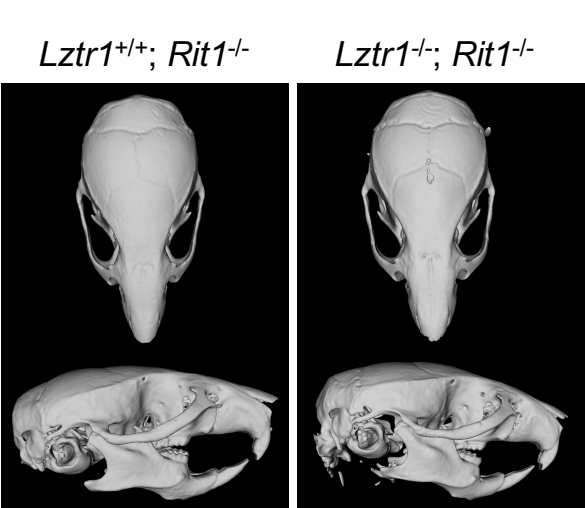

| Males                        | <i>Lztr1<sup>+/+</sup>; Rit1<sup>-/-</sup></i> (n=8) | <i>Lztr1<sup>-/-</sup>; Rit1<sup>-/-</sup></i> (n=6) | P value |
|------------------------------|------------------------------------------------------|------------------------------------------------------|---------|
| Length (mm; mean ± SD)       | 21.09 ± 0.83                                         | 20.78 ± 1.00                                         | 0.7242  |
| Width (mm; mean ± SD)        | 9.74 ± 0.24                                          | 9.78 ± 0.33                                          | 0.6620  |
| Intercanthal (mm; mean ± SD) | 3.91 ± 0.14                                          | 3.84 ± 0.09                                          | 0.2284  |

  

| Females                      | <i>Lztr1<sup>+/+</sup>; Rit1<sup>-/-</sup></i> (n=4) | <i>Lztr1<sup>-/-</sup>; Rit1<sup>-/-</sup></i> (n=6) | P value |
|------------------------------|------------------------------------------------------|------------------------------------------------------|---------|
| Length (mm; mean ± SD)       | 20.93 ± 0.61                                         | 20.01 ± 1.44                                         | 0.4762  |
| Width (mm; mean ± SD)        | 9.64 ± 0.19                                          | 9.56 ± 0.24                                          | 0.7619  |
| Intercanthal (mm; mean ± SD) | 3.89 ± 0.06                                          | 3.81 ± 0.07                                          | 0.2571  |

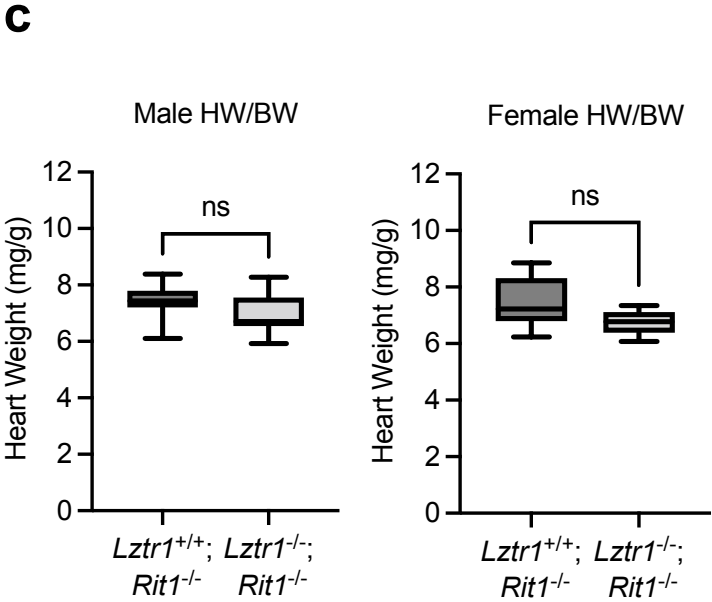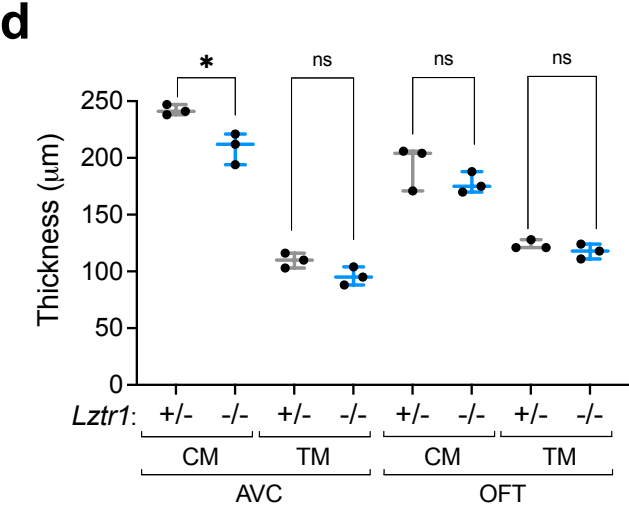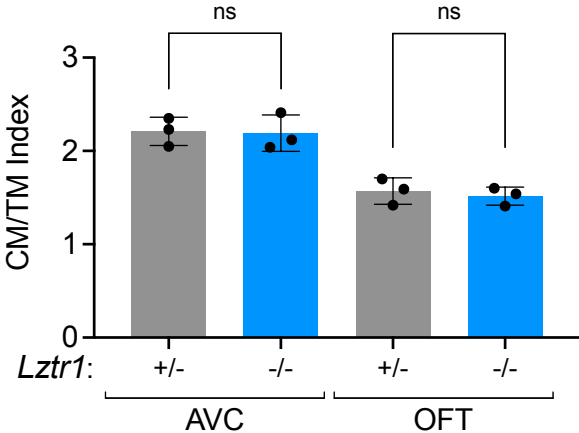

Supplement: supp [file elife-76495-supp-v1.zip]
