# Supplementary material for: Cross-species analysis of LZTR1 loss-of-function mutants demonstrates dependency to RIT1 orthologs
Source: eLife journal article supplement (doi:10.7554/elife.76495), 2022-04-25

**a**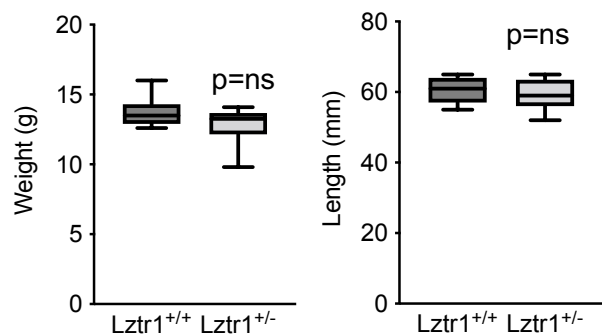**b**

| Males                            | $Lztr1^{+/+}$ (n=5) | $Lztr1^{+/-}$ (n=5) | P value |
|----------------------------------|---------------------|---------------------|---------|
| Length (mm; mean $\pm$ SD)       | 22.23 $\pm$ 0.53    | 22.48 $\pm$ 0.37    | 0.5476  |
| Width (mm; mean $\pm$ SD)        | 12.07 $\pm$ 0.13    | 12.07 $\pm$ 0.22    | 0.6905  |
| Intercanthal (mm; mean $\pm$ SD) | 4.22 $\pm$ 0.08     | 4.14 $\pm$ 0.08     | 0.2222  |

  

| Females                          | $Lztr1^{+/+}$ (n=9) | $Lztr1^{+/-}$ (n=7) | P value |
|----------------------------------|---------------------|---------------------|---------|
| Length (mm; mean $\pm$ SD)       | 21.41 $\pm$ 0.87    | 21.69 $\pm$ 1.08    | 0.4698  |
| Width (mm; mean $\pm$ SD)        | 11.85 $\pm$ 0.24    | 11.84 $\pm$ 0.32    | 0.6806  |
| Intercanthal (mm; mean $\pm$ SD) | 4.20 $\pm$ 0.11     | 4.11 $\pm$ 0.14     | 0.1738  |

**c**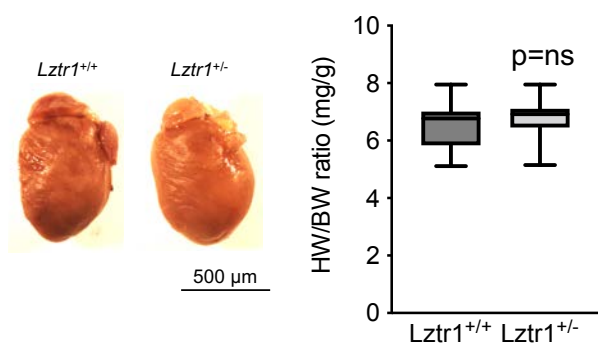**d**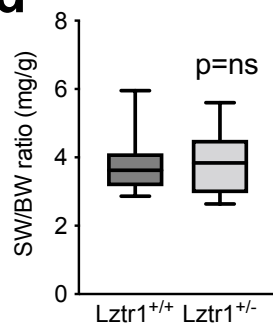**e**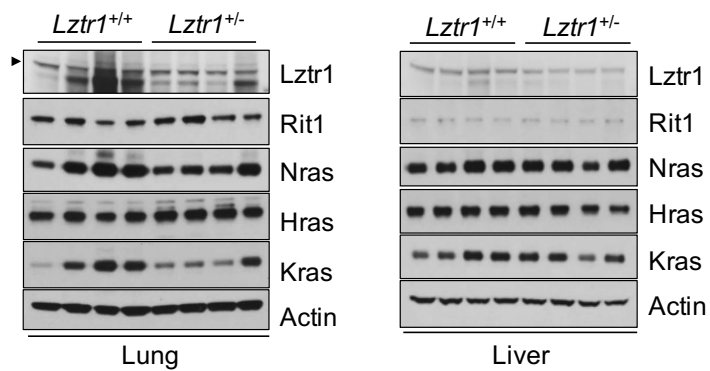

Supplement: supp [file elife-76495-supp-v1.zip]
