# Supplementary material for: Cross-species analysis of LZTR1 loss-of-function mutants demonstrates dependency to RIT1 orthologs
Source: eLife journal article supplement (doi:10.7554/elife.76495), 2022-04-25
Supplement: supp [file Figure 3 - source data 1.xlsx]

## Sheet: 3A
	Males
	Weight (g)			Length (mm)
	Lztr1+/+	Lztr1+/-		Lztr1+/+	Lztr1+/-
	16.5	14.5		64	67
	18.9	15.4		68	67
	18.2	13.9		69	66
	13.1	18.8		66	69
	17.1	14.5		62	65
	14.4	11.7		60	64
	15.8	16.8		58	65
	11.6	16.7		59	66
	14.8	15.5		68	67
	17	15.1		68	69
	16.5	13.6		66	68
	18.9	12.9			65
	19.5	16.4
	20.8	16.5
	16	16
	15.9	13.2
	15	11.9
	13.5	16.1
		15.5
		13.9

## Sheet: 3B
Males
	Length (mm)			Width (mm)			Interchantal (mm)
	Lztr1+/+	Lztr1+/-		Lztr1+/+	Lztr1+/-		Lztr1+/+	Lztr1+/-
	22.752	22.669		11.937	12.001		4.333	4.201
	21.409	22.786		12.246	12.39		4.262	4.109
	22.614	22.581		12.166	11.933		4.161	4.048
	22.03	22.53		12.002	11.842		4.168	4.242
	22.32	21.841		12.007	12.17		4.17	4.091
Average	22.225	22.4814		12.0716	12.0672		4.2188	4.1382

## Sheet: 3C
(HW/BW) Heart weight to body weight ratio
Males
Lztr1+/+	Lztr1+/-
6.97561	7.17277
6.42553	6.96078
5.54545	6.84492
5.9901	6.19469
6	5.02513
6.87831	6.28866
6.5641
6.68269

## Sheet: 3D
(SW/BW) Spleen weight to body weight ratio
Males
Lztr1+/+	Lztr1+/-
2.97561	3.29843
3.78723	3.23529
3.45455	3.15508
2.72277	4.86726
2.66667	2.31156
2.96296	2.1134
3.07692
2.25962

## Sheet: 3E
C57BL6 Pure
Lztr1+/+	16
Lztr1+/-	39
Lztr1-/-	0
Total	55
C57BL6/129Sv mixed F1
Lztr1+/+	16
Lztr1+/-	38
Lztr1-/-	1
Total	55
C57BL6/129Sv mixed F2
Lztr1+/+	19
Lztr1+/-	23
Lztr1-/-	3
Total	45
C57BL6/129Sv mixed F3
Lztr1+/+	11
Lztr1+/-	20
Lztr1-/-	3
Total	34
129Sv Pure
Lztr1+/+	31
Lztr1+/-	36
Lztr1-/-	0
Total	67
