# Supplementary material for: Cross-species analysis of LZTR1 loss-of-function mutants demonstrates dependency to RIT1 orthologs
Source: eLife journal article supplement (doi:10.7554/elife.76495), 2022-04-25
Supplement: supp [file Figure 3 - supplement 1 - source data.xlsx]

## Sheet: 3S1_A
	Weight (g)		Length (mm)
	Lztr1+/+	Lztr1+/-	Lztr1+/+	Lztr1+/-
	14.4	11.9	64	59
	14.2	13.6	61	65
	12.7	9.8	65	61
	13.7	14.1	63	64
	13.3	13.3	60	63
	13.5	13.7	64	55
	13.1	13.2	63	52
	12.6	12.9	57	57
	16	14.5	55	58
	13.9	11.4	55	63
	13	8.9	57	60
	12.4	12.8	61	56
	11.1	13.5	61	60
	12	12.8	58	62
	10.8	11.9		60
	13.2	10.5		58
		12.2		59
		11.8		58
		14.3
		15.5
		10.1
		7.9
		12.9
		11.1

## Sheet: 3S1_B
	Females
		Length (mm)			Width (mm)			Interchantal (mm)
		Lztr1+/+	Lztr1+/-		Lztr1+/+	Lztr1+/-		Lztr1+/+	Lztr1+/-
		21.89	21.791		11.94	11.924		4.26	4.258
		21.993	22.464		12.21	12.039		4.348	4.282
		21.171	21.638		12.038	11.866		4.369	4.015
		22.282	22.379		12.005	12.084		4.242	4.167
		21.866	22.486		11.843	12.161		4.16	4.084
		20.501	21.671		11.85	11.54		4.169	3.923
		21.286	19.395		11.524	11.281		4.081	4.006
		19.632			11.453			4.105
		22.099			11.762			4.086
	Average	21.4133	21.6891		11.8472	11.8421		4.20222	4.105

## Sheet: 3S1_C
	Females
	HW/BW (mg/g)
	Lztr1+/+	Lztr1+/-
	7	7.95181
	7.95181	6.92308
	5.11236	7.10692
	5.45977	6.45714
	6.77215	5.15
	6.21951	7.04545
	7.0229	6.66667
	6.90476
	6.6875

## Sheet: 3S1_D
	Females
	SW/BW (mg/g)
	Lztr1+/+	Lztr1+/-
	4	5.60241
	3.91566	3.24176
	4.01198	3.83648
	5.95506	4.51429
	3.33333	4.35
	4.43038	2.95455
	2.86585	2.63566
	3.20611
	3.01587
	3.3125
