# Supplementary material for: Cross-species analysis of LZTR1 loss-of-function mutants demonstrates dependency to RIT1 orthologs
Source: eLife journal article supplement (doi:10.7554/elife.76495), 2022-04-25
Supplement: supp [file Figure 4 - source data 1.xlsx]

## Sheet: 4B
	AVC				OFT
	CM		TM		CM		TM
Lztr1 Genotype	+/+	-/-	+/+	-/-	+/+	-/-	+/+	-/-
Thickness (um)	193	121	106	136	159	137	148	184
	223	148	77	158	175	101	91	158
	184	138	82	136	166	109	110	133
	168	115	74	149	146	79	100	136
	147	105	113	148	128	92	99	126
	AVC		OFT
Lztr1 Genotype	+/+	-/-	+/+	-/-
CM/TM index	1.83	0.89	1.07	0.74
	2.89	0.93	1.93	0.64
	2.25	1.01	1.51	0.82
	2.27	0.78	1.47	0.58
	1.3	0.71	1.3	0.73
	Lztr1 WT
	Embryo 743-E4		Embryo 700-E2		Embryo 743-E5		Embryo 743-E6		Embryo 02.3
	CM	TM	CM	TM	CM	TM	CM	TM	CM	TM
AVC	200	122	244	90	145	80	122	71	128	103
	180	80	235	82	173	56	187	74	153	136
	187	135	210	79	248	72	209	92	168	121
	192	87	206	60	144	87	130	53	123	92
	216	110	219	69	166	82	166	71	135	118
	181	99	221	82	225	112	193	83	174	110
average	192.667	105.5	222.5	77	183.5	81.5	167.833	74	146.833	113.333
Index CM/TM	1.82622		2.88961		2.25153		2.26802		1.29559
OFT	155	128	132	115	157	64	104	89	125	99
	135	100	169	109	163	100	160	93	139	91
	174	158	199	115	189	154	176	132	133	110
	185	139	155	78	138	110	104	82	133	86
	125	138	174	50	155	100	161	95	117	99
	180	207	221	76	190	123	173	107	123	108
	160	167			173	119
average	159.143	148.143	175	90.5	166.429	110	146.333	99.6667	128.333	98.8333
Index CM/TM	1.07425		1.9337		1.51299		1.46823		1.29848
	Lztr1 KO
	Embryo 749-E1		Embryo 749-E6		Embryo 749-E2		Embryo 743-E2		Embryo 02.6
	CM	TM	CM	TM	CM	TM	CM	TM	CM	TM
AVC	115	80	160	145	160	200	80	109	96	154
	140	180	144	142	136	137	90	165	83	145
	153	179	155	119	148	153	107	164	131	144
	65	118	122	161	150	126	104	138	99	139
	94	121	132	207	90	76	120	135	102	150
	156	135	175	176	143	125	190	180	118	154
average	120.5	135.5	148	158.333	137.833	136.167	115.167	148.5	104.833	147.667
Index CM/TM	0.889299		0.934737		1.01224		0.775533		0.709932
OFT	150	219	78	189	80	190	30	118	94	172
	130	223	60	128	118	102	70	113	81	123
	94	164	132	177	103	111	140	198	120	97
	118	210	98	112	113	105	45	90	81	134
	131	201	110	148	109	150	64	111	78	119
	157	160	129	192	129	139	123	187	99	112
	178	114
average	136.857	184.429	101.167	157.667	108.667	132.833	78.6667	136.167	92.1667	126.167
Index CM/TM	0.74206		0.641649		0.818068		0.577723		0.730515

## Sheet: 4D
LZTR1 Het x Het
Lztr1+/+	7
Lztr1+/-	12
Lztr1-/-	0
Total	19
LZTR1 Het x Het (RIT1 KO)
Lztr1+/+	27
Lztr1+/-	45
Lztr1-/-	13
Total	85

## Sheet: 4H
		WT		Lztr1 KO		Rit1 KO		Lztr1, Rit1 DKO
	FBS (1 h)	-	+	-	+	-	+	-	+
Spry2	Experiment 1	0.6226	4.6572	2.3461	5.2909	0.409	2.4735	0.8071	2.1173
	Experiment 2	1.7348	4.2582	1.4169	6.2953	1.2559	2.5278	0.7499	3.4807
	Experiment 3	0.9259	3.9256	2.2227	4.8933	1.2747	2.2057	0.8828	2.6461
Dusp6	Experiment 1	0.3132	3.3733	4.6471	5.0081	0.1659	2.3542	0.5512	2.4439
	Experiment 2	2.9902	8.8289	1.4303	11.4385	1.1581	1.5004	0.608	3.0667
	Experiment 3	1.068	4.691	2.451	7.699	1.537	2.293	0.944	2.426
