# Supplementary material for: Cross-species analysis of LZTR1 loss-of-function mutants demonstrates dependency to RIT1 orthologs
Source: eLife journal article supplement (doi:10.7554/elife.76495), 2022-04-25
Supplement: supp [file Figure 4 - supplement 1 - source data.xlsx]

## Sheet: 4S1_A
	Males		Females
	Weight (g)		Weight (g)
	Lztr1+/+	Lztr1-/-	Lztr1+/+	Lztr1-/-
	14.5	17.4	12.1	14.3
	15.8	15.6	14	12.7
	13.1	11.3	12.7	12.9
	16.5	15.6	12.7	12.1
	13.8	15.5	14.7	11.9
	15	15	14.1	13.1
	11.9	13.8	13.9	14.3
	13.4	12.3	15.4	14.8
	17.1	15.4	15.9	14.3
	18.3	16.7	12.3	15.8
	17	16.3	11.7	14.9
	18.5	17.6	10.4	14.4
	19.1	17.8	10.2	14.6
	17.5	15		10.8
		19
		18
		8.8
		12.8
		14.8
		18.6
		18.5
		13.3
		17.3
		18

## Sheet: 4S1_B
	Length (mm)					Width (mm)					Intercanthal (mm)
	Males		Females			Males		Females			Males		Females
	Lztr1+/+	Lztr1-/-	Lztr1+/+	Lztr1-/-		Lztr1+/+	Lztr1-/-	Lztr1+/+	Lztr1-/-		Lztr1+/+	Lztr1-/-	Lztr1+/+	Lztr1-/-
	21.5191	19.9045	20.1489	19.5145		9.9984	9.9878	9.4951	9.6503		3.8397	3.8825	3.8229	3.8324
	21.0423		20.7803	18.2479		9.3821	9.5217	9.4612	9.7747		3.7428	3.9316	3.8549	3.6806
	20.3111	20.1342	21.5458	18.5196		9.6881	9.759	9.8046	9.825		4.0527	3.7811	3.9408	3.7701
	19.4125	20.1147	21.2278	21.2586		9.5664	9.2492	9.7953	9.5138		3.7092	3.7032	3.9375	3.8637
	21.4905	21.8524		21.3606		9.5777	10.07		9.1821		4.0626	3.9071		3.8734
	21.403	21.8799		21.1662		9.6685	10.0542		9.4164		3.9416	3.8374		3.8429
	21.6037					9.9877					3.9251
	21.93					10.0102					4.0182

## Sheet: 4S1_C
	Males		Females
	Weight (g)		Weight (g)
	Lztr1+/+	Lztr1-/-	Lztr1+/+	Lztr1-/-
	6.6	6.64	6.23	6.07
	7.2	7.38	7.23	6.85
	6.1	7.96	6.84	6.98
	7.43	5.92	7.22	7.11
	8.38	6.28	6.78	6.45
	7.46	6.75	7.94	6.77
	8.37	6.52	8.86	6.45
	7.22	6.62	8.44	7.34
	7.49	8.28		6.38
	7.38	6.65		7.25
	7.79	7.19		6.37
		7.61

## Sheet: 4S1_D
	AVC				OFT
	CM		TM		CM		TM
Rit1 Genotype	-/-	-/-	-/-	-/-	-/-	-/-	-/-	-/-
Lztr1 Genotype	Het	-/-	Het	-/-	Het	-/-	Het	-/-
Thickness (um)	238	194	116	95	206	188	121	118
	247	221	110	104	171	170	121	111
	241	212	103	88	204	175	128	124
	AVC		OFT
Rit1 Genotype	-/-	-/-	-/-	-/-
Lztr1 Genotype	Het	-/-	Het	-/-
CM/TM index	2.05	2.04	1.7	1.6
	2.23	2.12	1.42	1.54
	2.35	2.41	1.59	1.41
	LZTR1 Het ;Rit1 KO #1		LZTR1 Het ;Rit1 KO #2		LZTR1 Het ;Rit1 KO #3		LZTR1;Rit1 Double KO #1		LZTR1;Rit1 Double KO #2		LZTR1;Rit1 Double KO #3
	CM	TM	CM	TM	CM	TM	CM	TM	CM	TM	CM	TM
AVC	235	133	198	143	233	74	183	111	210	132	188	94
	239	78	236	102	243	84	178	86	198	99	197	90
	234	81	263	150	235	114	173	99	210	106	243	82
	198	132	271	82	248	94	193	89	234	93	228	98
	244	92	244	86	242	118	201	75	265	102	231	79
	280	180	267	99	246	132	235	109	208	92	184	85
average	238.333	116	246.5	110.333	241.167	102.667	193.833	94.8333	220.833	104	211.833	88
Index CM/TM	2.0546		2.23414		2.34903		2.04394		2.1234		2.4072
OFT	214	87	154	131	178	124	174	126	196	109	172	119
	212	130	183	122	195	120	169	117	158	116	157	120
	203	139	182	132	191	129	164	124	184	137	185	121
	188	136	172	121	201	128	203	112	171	104	176	138
	206	127	163	127	209	128	224	114	182	95	166	133
	212	113	178	104	233	145	187	124	136	97	181	135
	205	117	168	110	221	123	197	109	165	116	189	102
average	205.714	121.286	171.429	121	204	128.143	188.286	118	170.286	110.571	175.143	124
Index CM/TM	1.69611		1.41677		1.59197		1.59564		1.54005		1.41244
