# Supplementary figures and images for: Cross-species analysis of LZTR1 loss-of-function mutants demonstrates dependency to RIT1 orthologs
Source: eLife journal article supplement (doi:10.7554/elife.76495), 2022-04-25

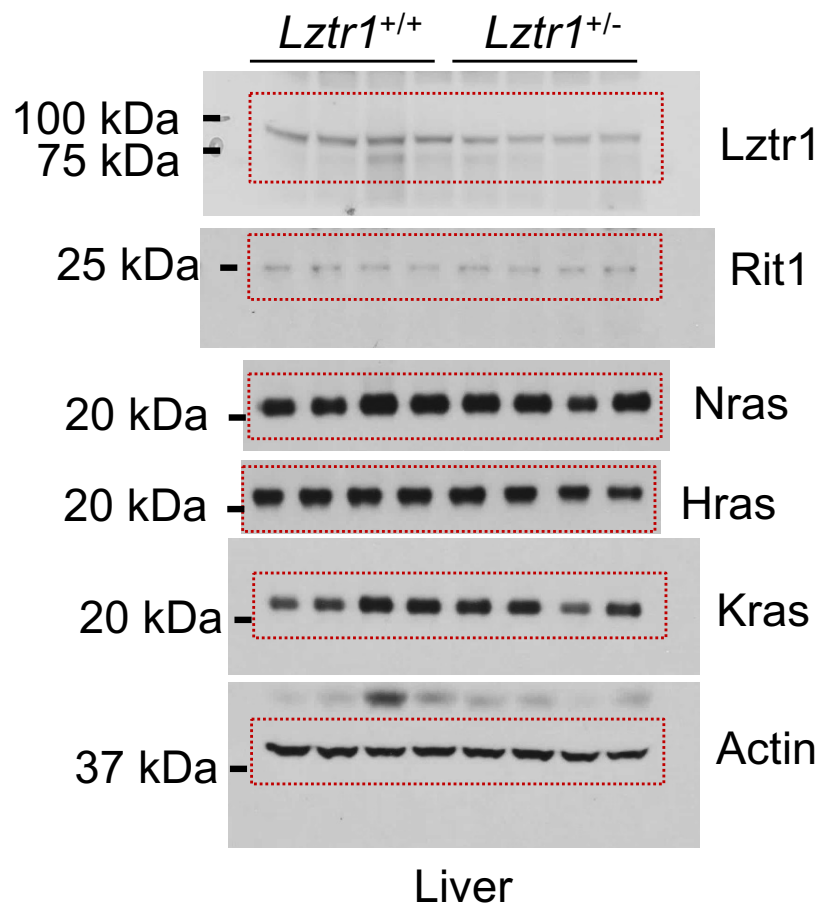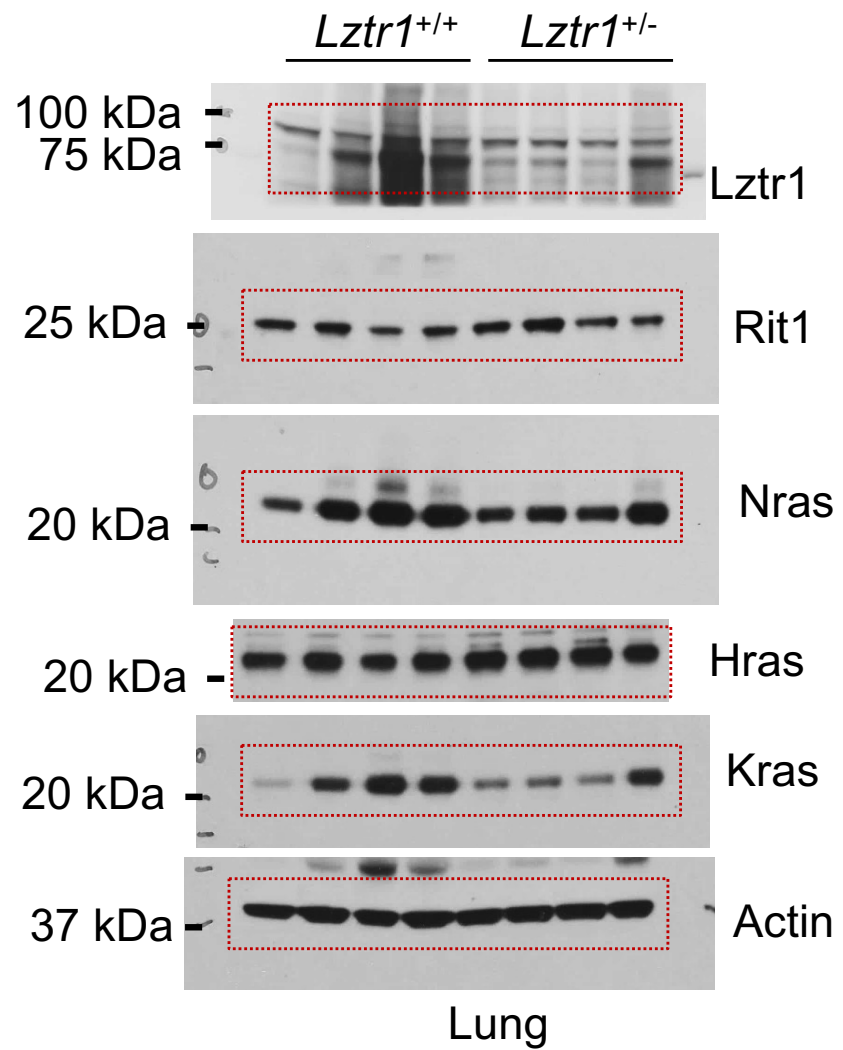

Supplement: supp [file elife-76495-supp-v1.zip]

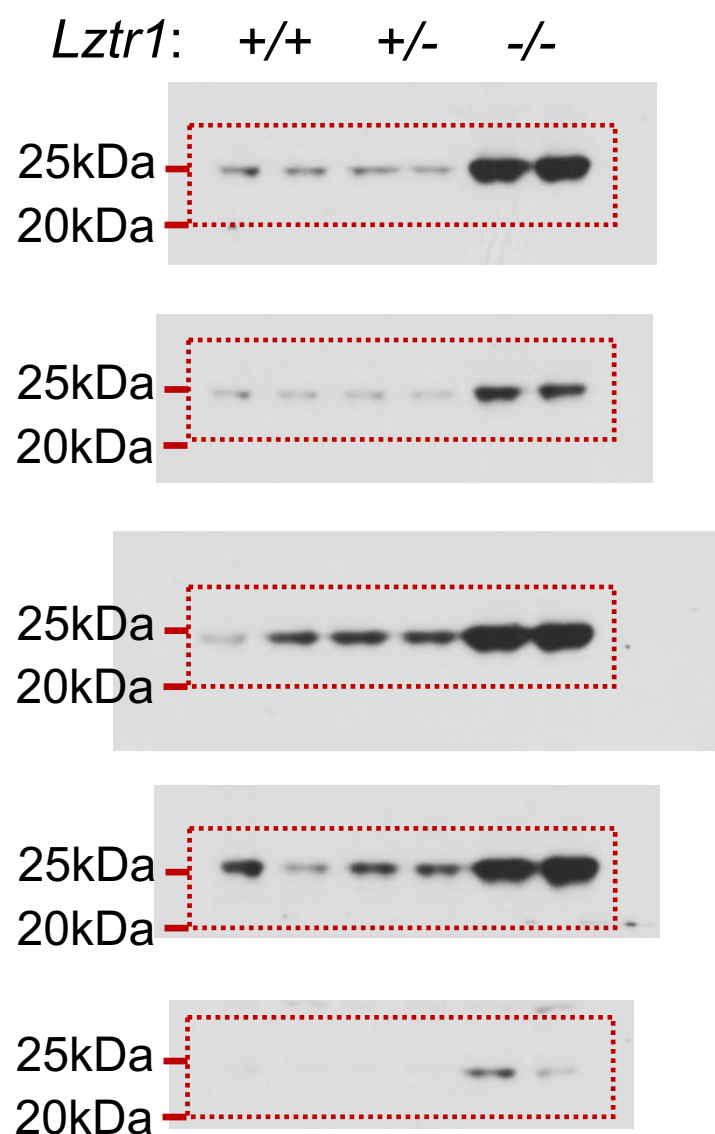

RIT1

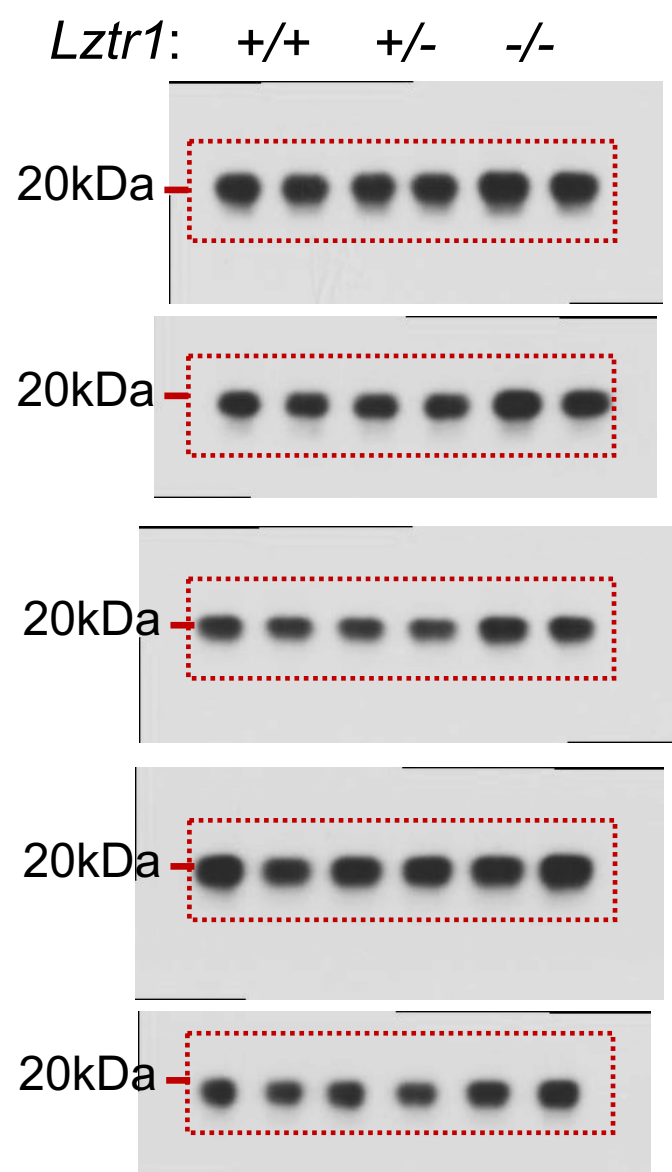

panRAS

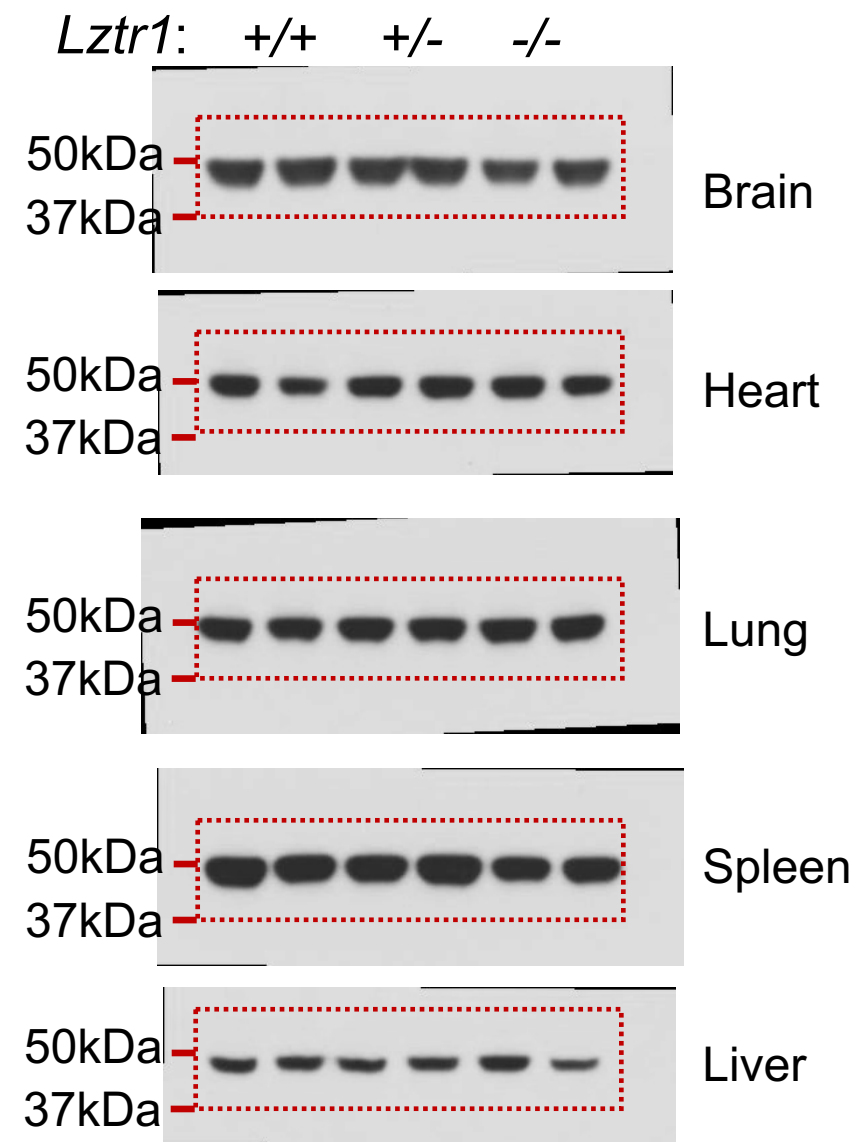

Tubulin

Supplement: supp [file elife-76495-supp-v1.zip]

*Lztr1*: +/+ -/- +/+ -/- -/-

*Rit1*: +/+ +/+ -/- -/- -/-

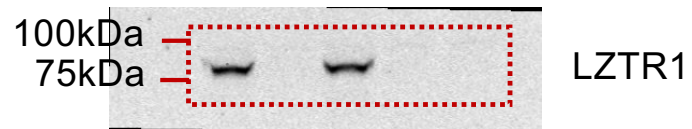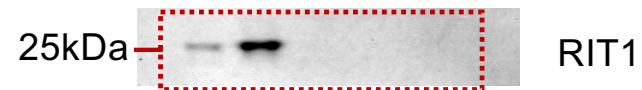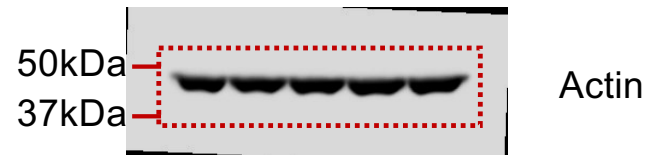

Supplement: supp [file elife-76495-supp-v1.zip]

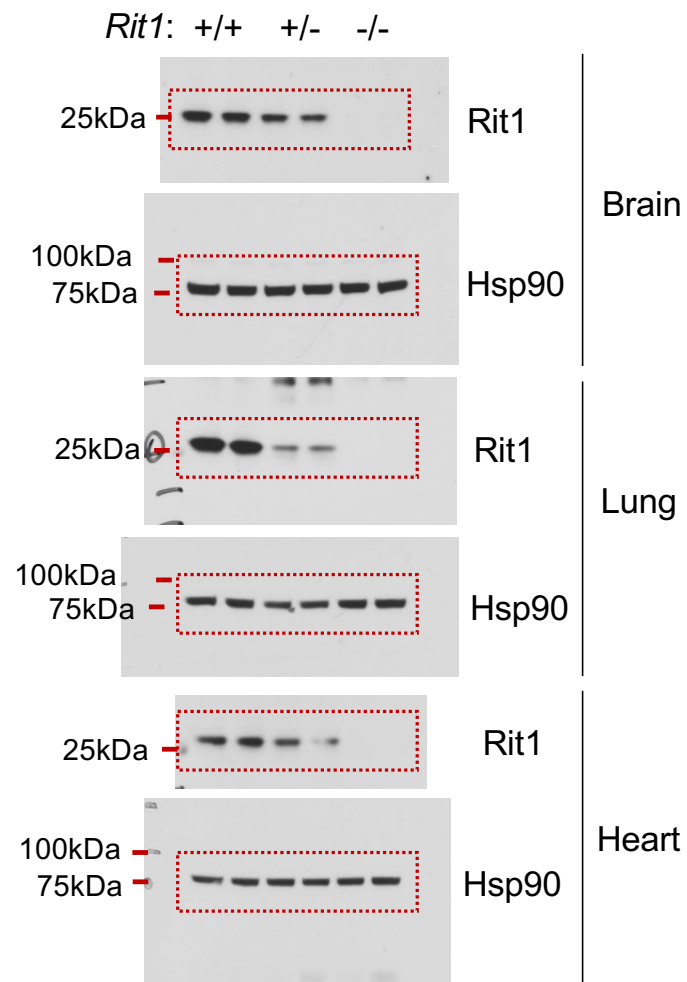

Supplement: supp [file elife-76495-supp-v1.zip]

Flag-SOS<sup>cat</sup> (*H. sapiens*)

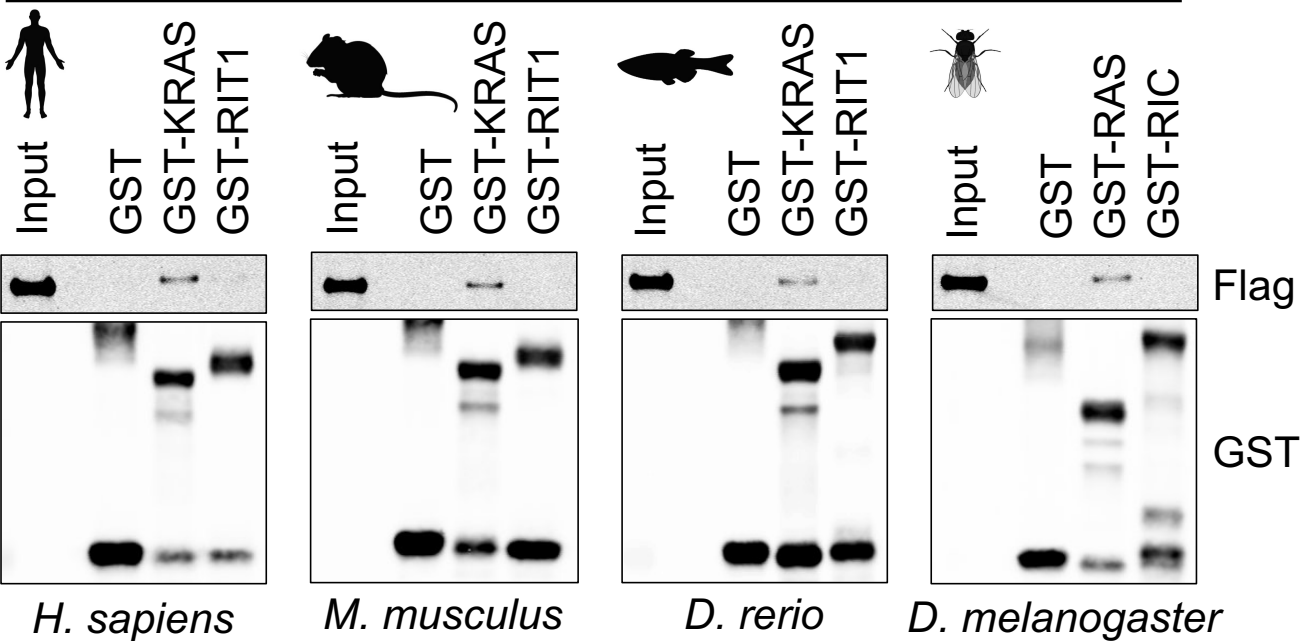

Supplement: supp [file elife-76495-supp-v1.zip]

|            |                         |                         |                          |                         |
|------------|-------------------------|-------------------------|--------------------------|-------------------------|
|            | <i>yw</i>               |                         | <i>Lztr1<sup>2</sup></i> |                         |
|            | <i>Ras<sup>HA</sup></i> | <i>Ric<sup>HA</sup></i> | <i>Ras<sup>HA</sup></i>  | <i>Ric<sup>HA</sup></i> |
| Transgene: | .                       | .                       | .                        | .                       |

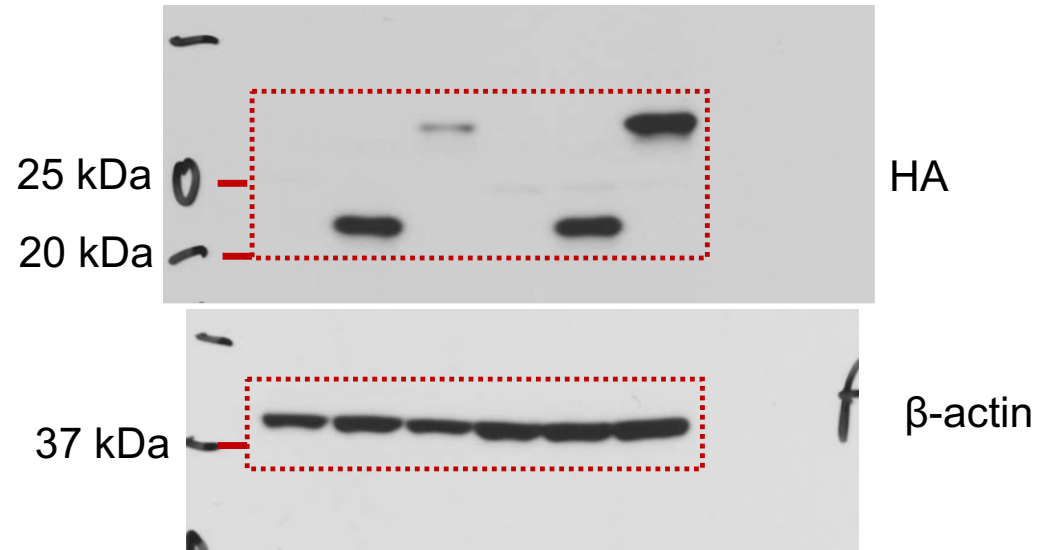

Supplement: supp [file elife-76495-supp-v1.zip]

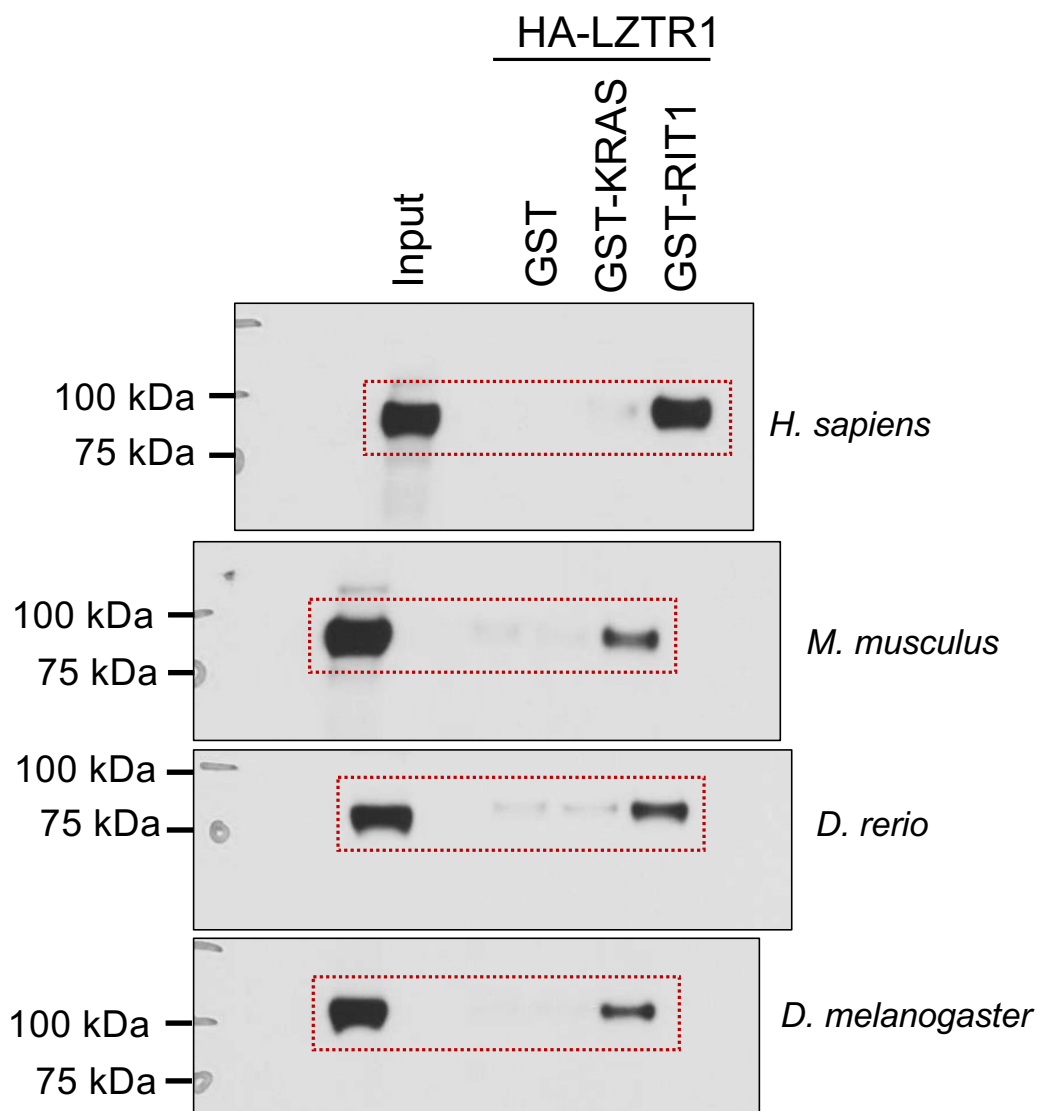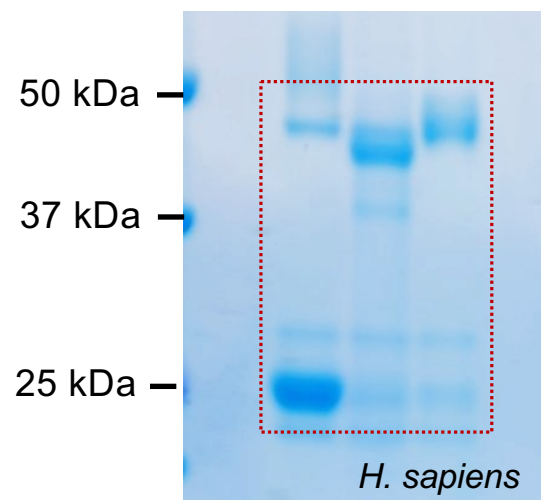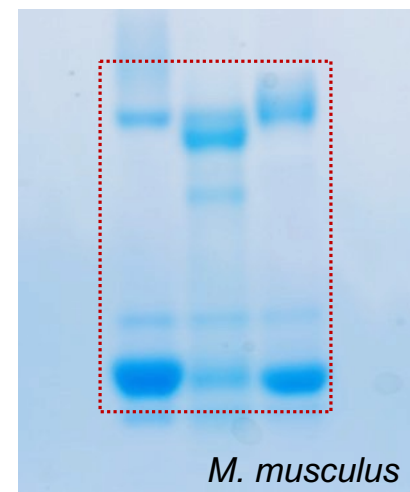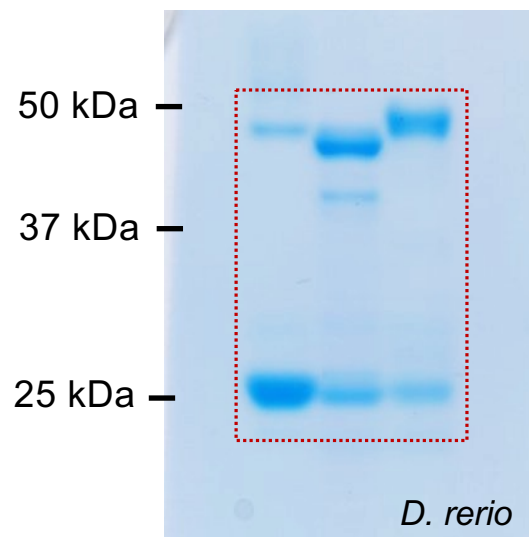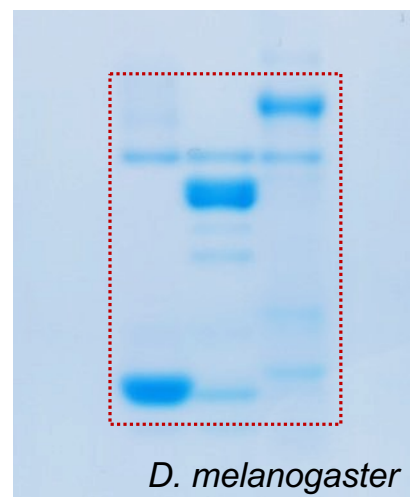

Supplement: supp [file elife-76495-supp-v1.zip]

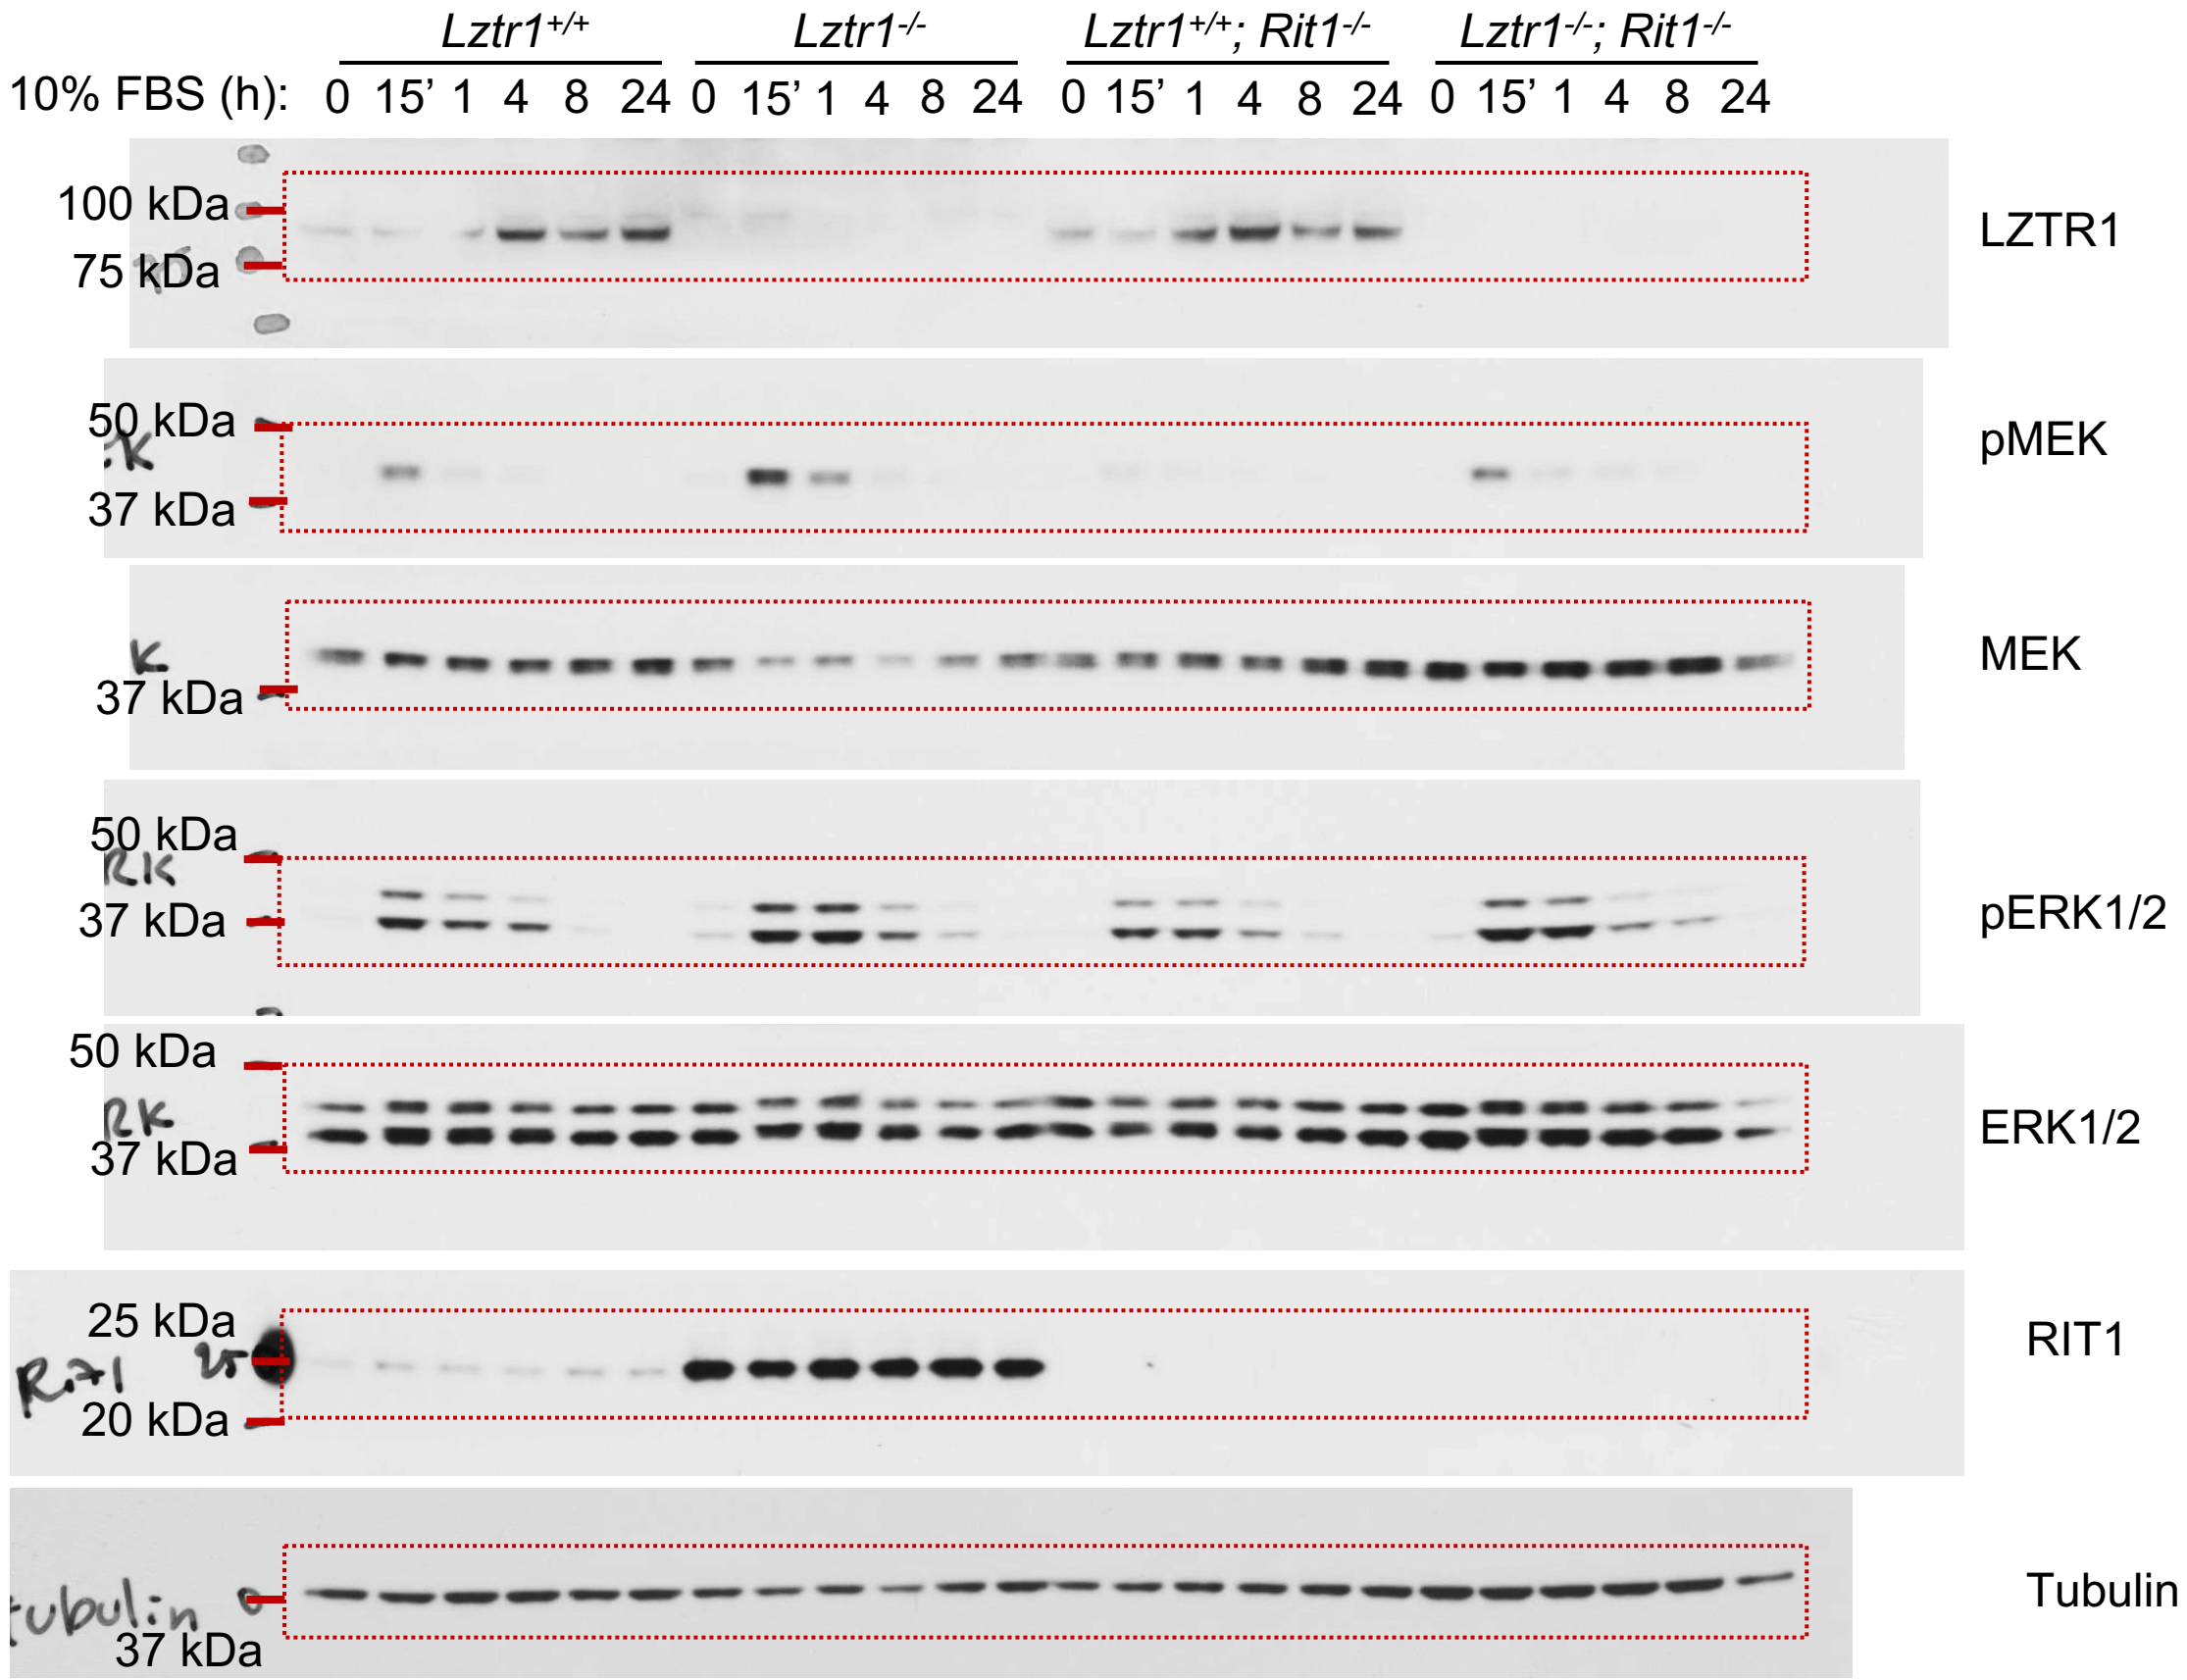

Supplement: supp [file elife-76495-supp-v1.zip]
